# Supplementary material for: The Core Stem Genes SOX2, POU5F1/OCT4, and NANOG Are Expressed in Human Parathyroid Tumors and Modulated by MEN1, YAP1, and β-catenin Pathways Activation
Source: MDPI journal article supplement (doi:10.3390/biomedicines9060637), 2021-06-02
Supplement: s1 [file s1]

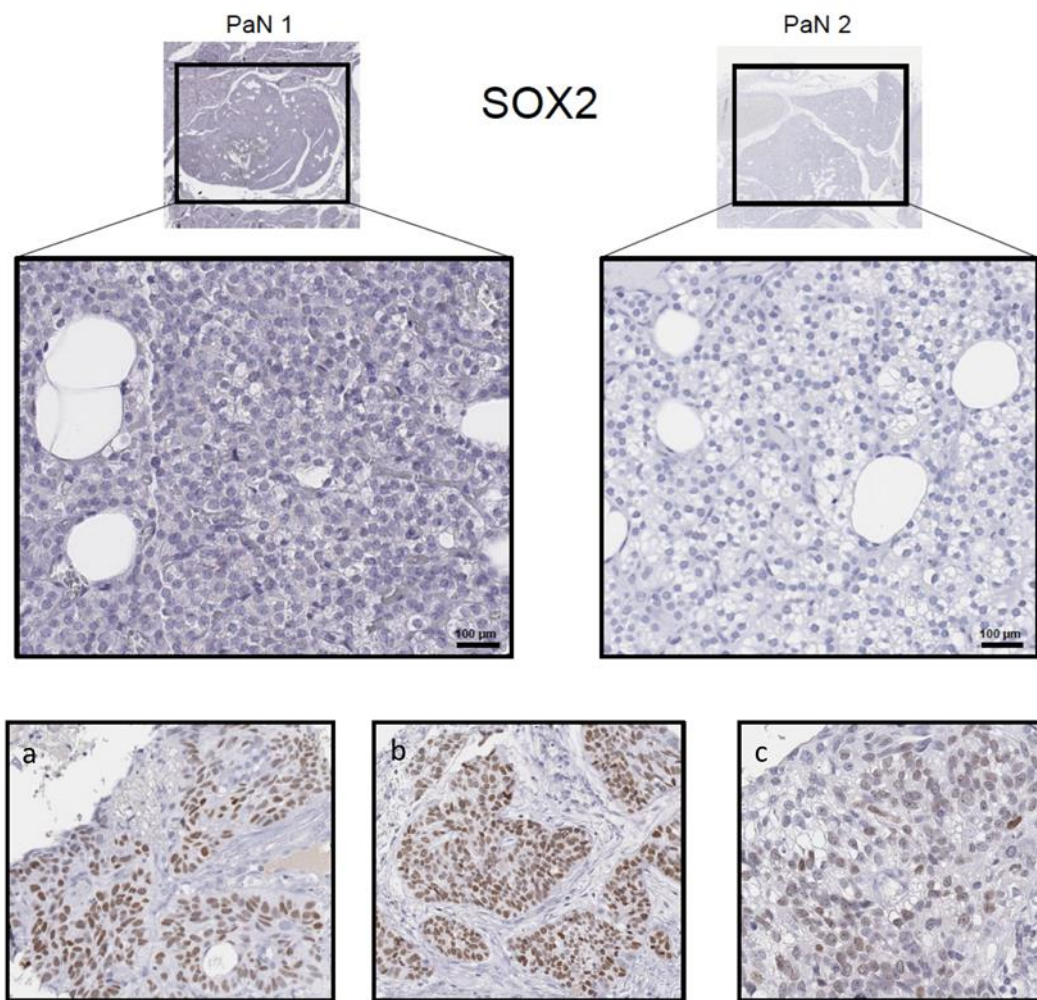

**Supplementary Figure S1.** IHC for SOX2. Upper panels represent normal parathyroid glands from normocalcemic patients negatively stained for SOX2. In panels a-c, nuclear positive IHC for SOX2 of sections from human non small cell lung cancer used as positive control. PaN, normal parathyroid gland.
